# Supplementary material
Source: PubMed Central journal article supplement (PMC6239217)
Supplement: NIHMS1500471-supplement-3.pdf [file NIHMS1500471-supplement-3.pdf]

# Supplementary Table 1: Identifications

H-ISO/L-Sham means this replicate is proteins mixed from H-AHA labeled ISO-mice and L-AHA labeled sham-mice as 1:1 ratio after protein assay. H-sham/L-ISO was named in the same way. All Proteins were required to be identified at least 1 peptide. All peptides were required to be fully tryptic. For all datasets, both protein FDR and peptide FDR were <1%.

| Labeling Time frame | Replicate | Content      | AHA Protein | AHA Peptide |
|---------------------|-----------|--------------|-------------|-------------|
| Day1-4              | A         | H-ISO/L-Sham | 2,189       | 9,522       |
|                     | B         | H-ISO/L-Sham | 1,515       | 5,493       |
|                     | C         | H-sham/L-ISO | 1,232       | 3,811       |
| Day10-14            | E         | H-ISO/L-Sham | 1,053       | 3,581       |
|                     | F         | H-ISO/L-Sham | 1,306       | 5,511       |
|                     | G         | H-sham/L-ISO | 1,574       | 6,899       |
